# Supplementary material
Source: PubMed Central journal article supplement (PMC9214938)
Supplement: sj-pdf-1-nho-10.1177_19418744221083182.pdf [file sj-pdf-1-nho-10.1177_19418744221083182.pdf]

**Supplemental Figures & Tables**

Table e-1: Top Neurohospitalist MS-DRGs & Representative Diagnoses

Table e-2: Epilepsy Base MS-DRGs

Table e-3: Stroke Base MS-DRGs

Figure e1a-e: Difference-in-Difference Modeling – Check for Parallel Trend Assumption

Table e-4: Secondary Clinical Outcomes

Table e-5: Patient Satisfaction in Intervention and Controls

Table e-6: Sensitivity Analysis: 30 Day Readmissions Pre vs Post Including Inpatient and Observation Status Patients

Table e-7: Sensitivity Analysis: Length of Stay Pre vs Post Including Inpatient and Observation Status Patients

**Table e-1: Top MS DRGs & Representative Diagnoses**

| <b>Base MS DRG</b> | <b>Base MS DRG</b>                               | <b>Representative Diagnoses</b>                                                                                                                                                                             |
|--------------------|--------------------------------------------------|-------------------------------------------------------------------------------------------------------------------------------------------------------------------------------------------------------------|
| 37                 | Seizures                                         | Epilepsy, seizure                                                                                                                                                                                           |
| 20                 | Degenerative disorders                           | Myasthenia gravis, amyotrophic lateral sclerosis, Parkinson's disease, Alzheimer's dementia, Dementia with Lewy Bodies, Creutzfeldt Jakob Disease, Huntington's, Progressive Multifocal Leukoencephalopathy |
| 36                 | Nonbacterial CNS infections exc viral meningitis | Viral encephalitis, fungal meningitis, acute disseminated encephalomyelitis, transverse myelitis, other encephalitis                                                                                        |
| 19                 | Nervous system neoplasms                         | Primary brain tumor, brain metastases                                                                                                                                                                       |
| 59                 | Multiple sclerosis or cerebellar ataxia          | Multiple sclerosis, neuromyelitis optica                                                                                                                                                                    |
| 34                 | Other diseases of the nervous system             | Toxic encephalopathy, myoclonus, vascular myelopathy, intracranial hypotension, stiff person syndrome, paresthesia, aphasia                                                                                 |
| 35                 | Bacterial Tb of the nervous system               | Guillain-barre syndrome, intracranial abscess                                                                                                                                                               |
| 43                 | Neurologic eye disease                           | Optic neuritis, III and VI nerve palsies                                                                                                                                                                    |
| 27                 | Cranial or peripheral nerve disorders            | Chronic inflammatory demyelinating polyneuropathy, Zoster encephalitis, other polyneuritis, brachial or lumbosacral plexopathy, trigeminal neuralgia                                                        |
| 38                 | Headache                                         | Migraine, cluster                                                                                                                                                                                           |
| 22                 | Acute stroke with thrombolytic                   | Ischemic stroke                                                                                                                                                                                             |
| 23                 | ICH or stroke                                    | Intracranial hemorrhage, ischemic stroke                                                                                                                                                                    |
| 25                 | TIA                                              | Transient ischemic attack                                                                                                                                                                                   |

Abbreviations: MS DRG, Medicare-Severity Diagnosis Related Group.

**Table e-2: Epilepsy Base MS-DRGs**

| <b>Base MS DRG</b> | <b>Base MS DRG</b>                 | <b>Representative Diagnoses</b>                                        |
|--------------------|------------------------------------|------------------------------------------------------------------------|
| 34                 | OTHER DIS NERV SYS                 | Encephalopathy, numbness, aphasia                                      |
| 37                 | SEIZURES                           |                                                                        |
| 108                | CARD ARRHYTH CONDUCT DIS           | Cardiac dysrhythmia                                                    |
| 110                | SYNCOPE COLLAPSE                   |                                                                        |
| 296                | ACUTE ADJUST REACT PSYOSOC DYSFUNC | Conversion, delirium, anxiety                                          |
| 298                | NEUROSES EXC DEPRESSIVE            | Somatoform disorders, post-traumatic stress disorder                   |
| 300                | ORGANIC DISTURB MENT RETARD        | Unspecified dementia                                                   |
| 301                | PSYCHOSES                          | Major depressive disorder, unspecified psychosis                       |
| 303                | OTHER MENT DIS DX                  | Other specified psychophysiological malfunction, recurrent hypersomnia |
| 323                | SIGNS SYMPTOMS                     | Disorientation, altered mental status unspecified                      |

Abbreviations: MS DRG, Medicare-Severity Diagnosis Related Group.

**Table e-3: Stroke Base MS-DRGs**

| <b>Base MS DRG</b> | <b>Base MS DRG</b>                                | <b>Representative Diagnoses</b>                                           |
|--------------------|---------------------------------------------------|---------------------------------------------------------------------------|
| 10                 | INTRACRANIAL VASCULAR PROCS W PDX<br>HEMORRHAGE   |                                                                           |
| 15                 | CAROTID ARTERY STENT PROCS                        | Percutaneous carotid angioplasty                                          |
| 16                 | EXTRACRANIAL PROCS                                | Extirpation of matter from carotid, open<br>approach                      |
| 22                 | ACUTE ISCHEMIC STROKE W<br>THROMBOLYTIC           |                                                                           |
| 23                 | INTRACRANIAL HEMORRHAGE OR<br>CEREBRAL INFARCTION |                                                                           |
| 24                 | NONSPECIFIC CVA OR PRECEREB<br>OCCLUS             | Carotid angioplasty                                                       |
| 25                 | TIA                                               |                                                                           |
| 31                 | TRAUMATIC COMA GREATER 1 HR                       | Traumatic subdural hematoma, Traumatic<br>carotid or vertebral dissection |
| 32                 | TRAUMATIC COMA LESS 1 HR                          | Traumatic subdural hematoma, Traumatic<br>carotid or vertebral dissection |
| 91                 | OTHER VASC PROCS                                  | Extirpation of matter from femoral artery,<br>Open Approach               |
| 104                | PERIPH VASC DIS                                   | Carotid dissection, vertebral dissection                                  |

Abbreviations: MSDRG, Medicare-Severity Diagnosis Related Group.

### Figure e-1a-e: Difference-in-Difference Modeling – Check for Parallel Trend Assumption

Figure e-1a: Length of Stay. Trends by Year

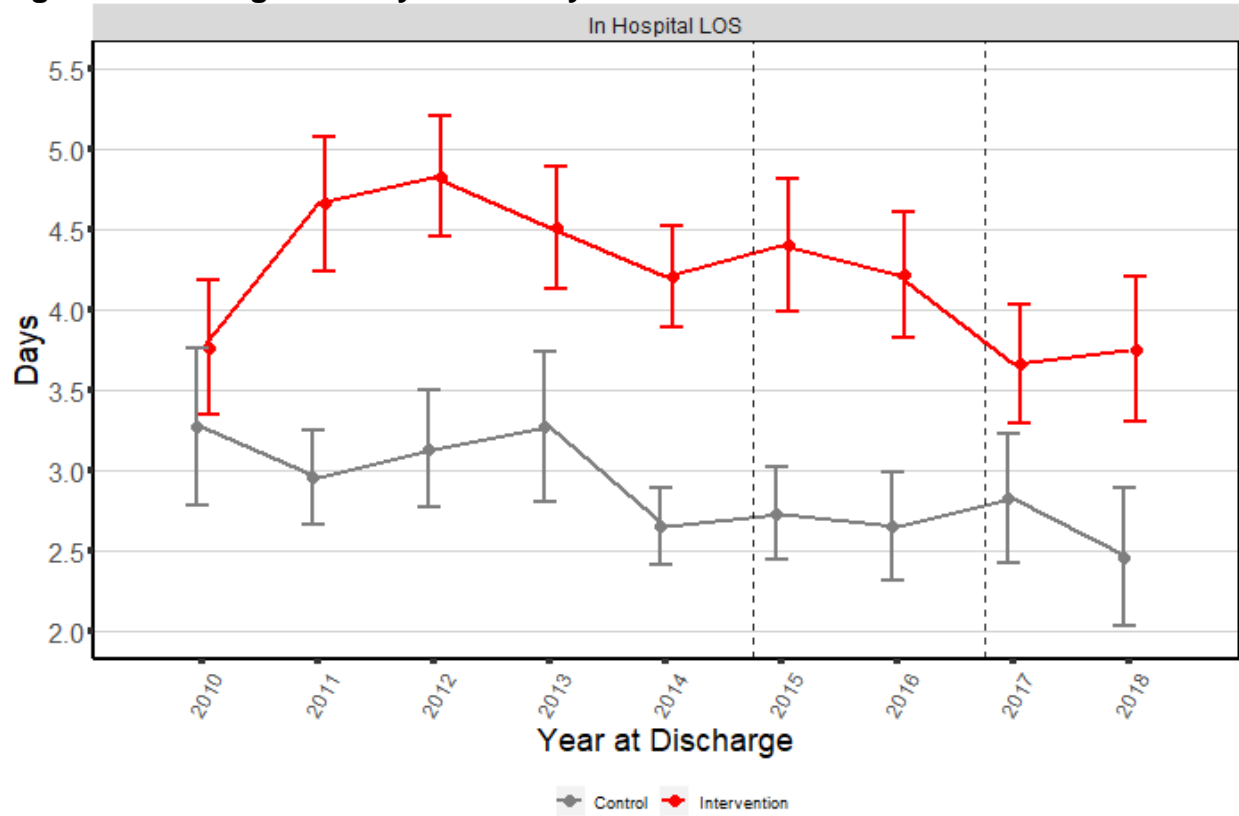

Figure e-1b: Adjusted 30 Day-Readmission Rate, Trends by Year

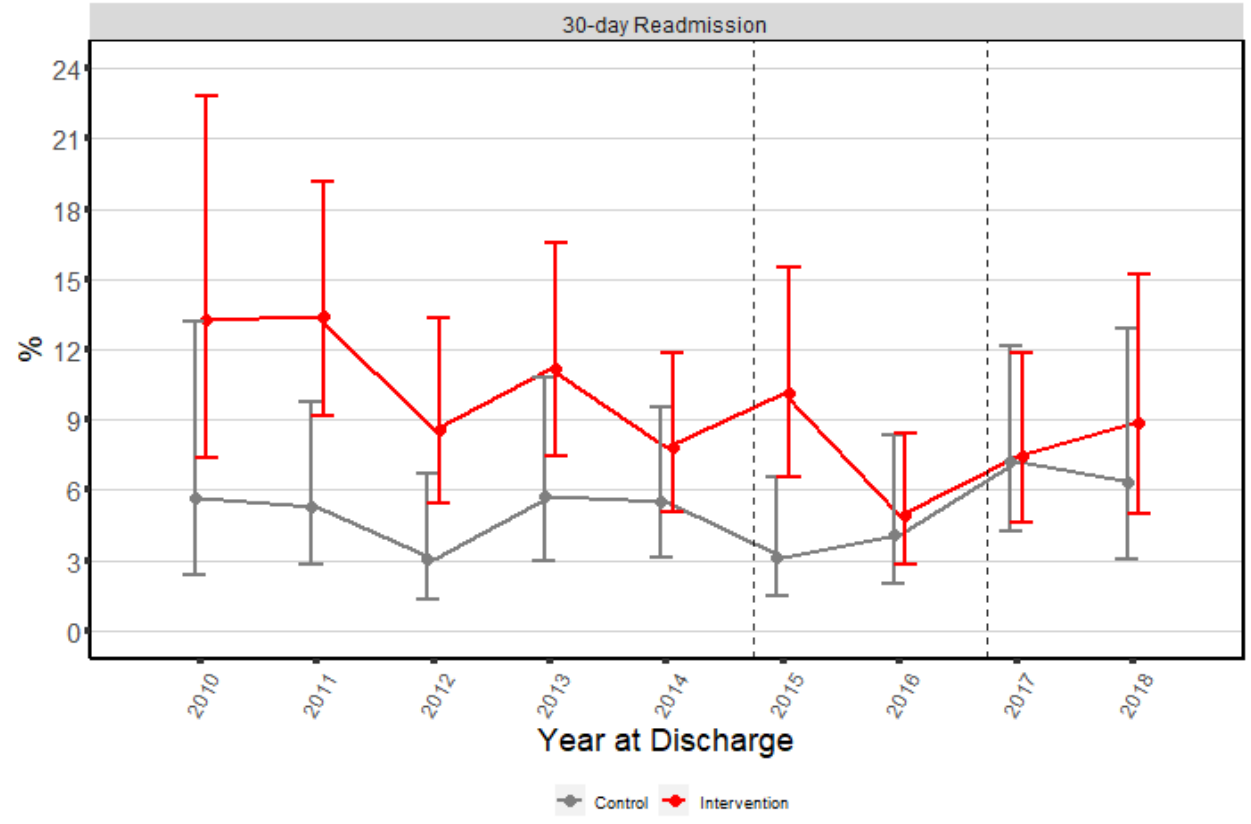

**Figure e-1c: Adjusted In-hospital Complication Rate, Trends by Year**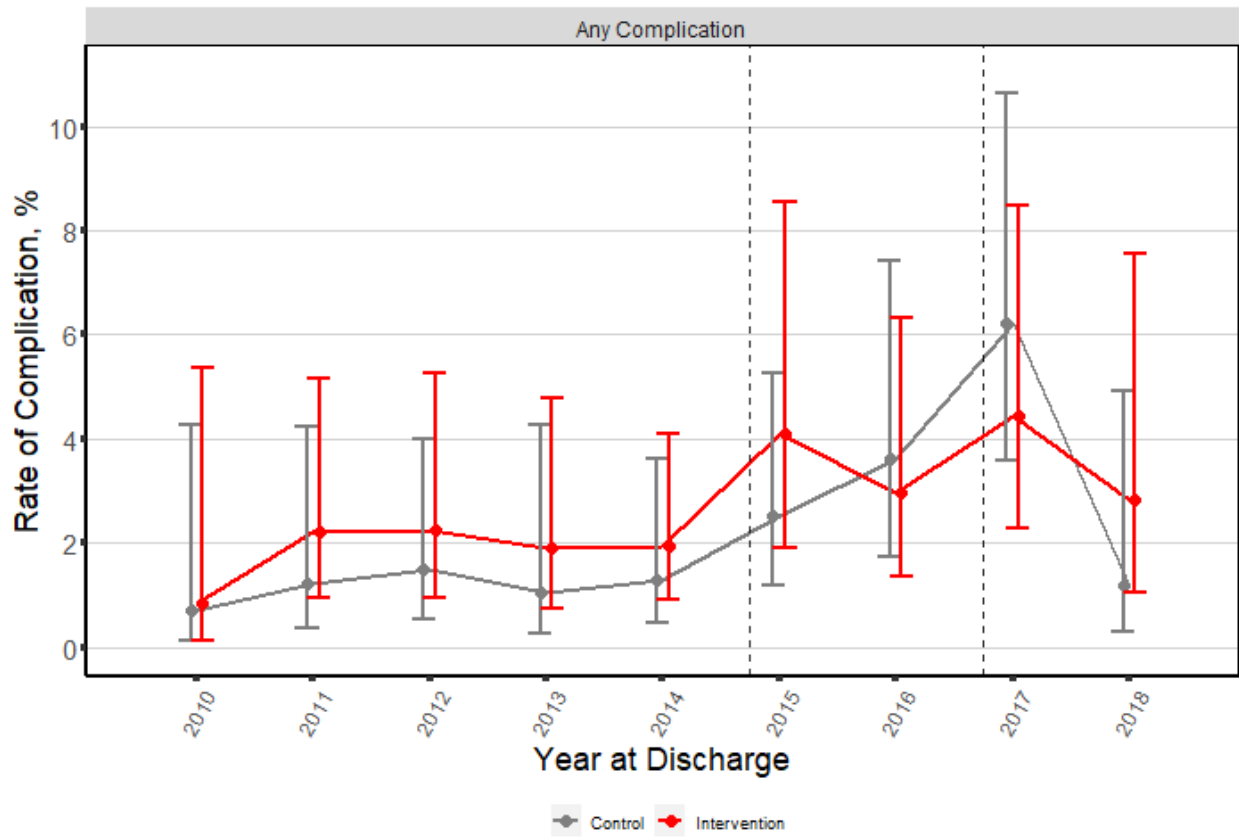

Figure e1-d: Unadjusted Complication Rate, Trends by Year

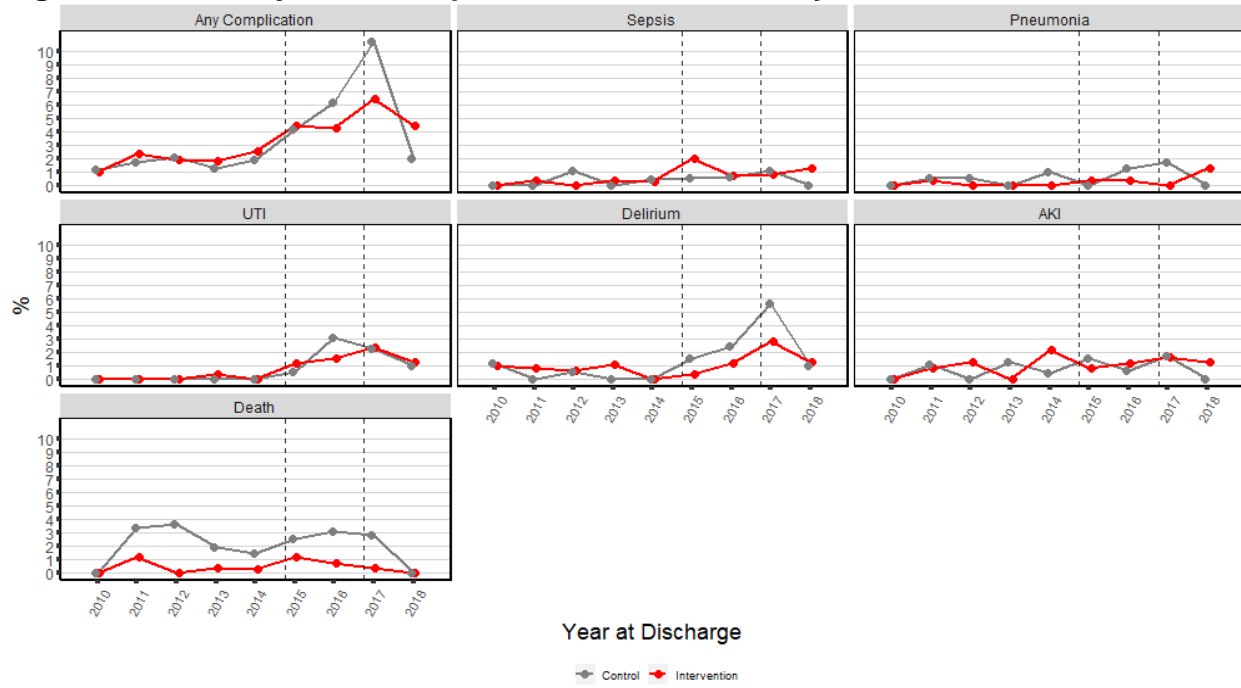

Abbreviations: UTI, urinary tract infection; AKI, acute kidney injury.



Figure e-1e: Consultant Utilization Rate, Trends by Year

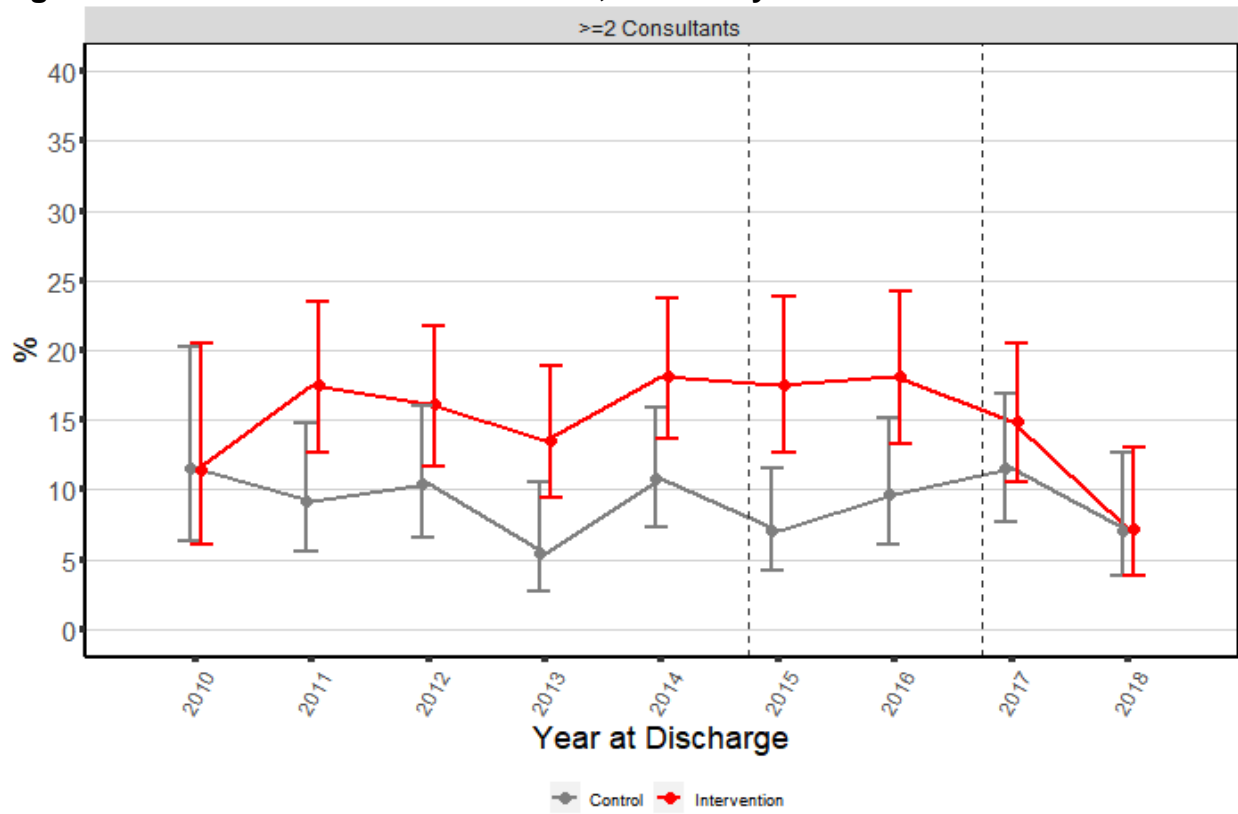

**Table e-4: Secondary Clinical Outcomes**

|                                         | Intervention (Neurohospitalist) |                 |         | Control (Stroke) |                 | P value |
|-----------------------------------------|---------------------------------|-----------------|---------|------------------|-----------------|---------|
|                                         | Pre<br>(n=1121)                 | Post<br>(n=527) | P value | Pre<br>(n=717)   | Post<br>(n=341) |         |
| <b>Clinical</b>                         |                                 |                 |         |                  |                 |         |
| <b>In-Hospital Death (%)</b>            | 1 (0.1)                         | 2 (0.4)         | 0.50    | 5 (0.7)          | 7 (2.1)         | 0.10    |
| <b>In-Hospital<br/>Complication (%)</b> |                                 |                 |         |                  |                 |         |
| <i>POA not Yes</i>                      |                                 |                 |         |                  |                 |         |
| Any                                     | 21 (1.9)                        | 24 (4.6)        | 0.003   | 11 (1.5)         | 25 (7.3)        | <0.001  |
| Sepsis                                  | 2 (0.2)                         | 4 (0.8)         | 0.16    | 2 (0.3)          | 2 (0.6)         | 0.82    |
| Pneumonia                               | 1 (0.1)                         | 2 (0.4)         | 0.50    | 3 (0.4)          | 3 (0.9)         | 0.62    |
| UTI                                     | 1 (0.1)                         | 9 (1.7)         | <0.001  | 0 (0.0)          | 6 (1.8)         | 0.002   |
| Delirium                                | 8 (0.7)                         | 9 (1.7)         | 0.11    | 2 (0.3)          | 13 (3.8)        | <0.001  |
| AKI                                     | 9 (0.8)                         | 6 (1.1)         | 0.70    | 4 (0.6)          | 3 (0.9)         | 0.84    |
| Thrombosis (DVT/PE)                     | 0 (0.0)                         | 1 (0.2)         | 0.70    | 0 (0.0)          | 1 (0.3)         | 0.70    |

Abbreviations: POA, present on admission; UTI, urinary tract infection; AKI, acute kidney injury; DVT, deep venous thrombosis; PE, pulmonary embolism; Rx/IV, medication and/or intravenous therapy.

**Table e-5: Patient satisfaction in intervention and controls**

|                                                                     | Intervention (Neurohospitalist) |                   |                  | Control (Stroke)  |                   |                  |
|---------------------------------------------------------------------|---------------------------------|-------------------|------------------|-------------------|-------------------|------------------|
|                                                                     | Pre                             | Post              | SMD <sup>a</sup> | Pre               | Post              | SMD <sup>a</sup> |
| Number of patient encounters                                        | 1121                            | 527               |                  | 717               | 341               |                  |
| Encounters with Patient Satisfaction Surveys<br>n (%)               | 129<br>(11.5)                   | 47 (8.9)          |                  | 72 (10.0)         | 11 (3.2)          |                  |
| <i>TopBox Answer, %</i>                                             |                                 |                   |                  |                   |                   |                  |
| Likelihood of recommending this hospital to others                  | 88 (70.4)                       | 36 (80.0)         | 0.22             | 48 (68.6)         | 8 (72.7)          | 0.09             |
| How often did doctors treat you with courtesy and respect           | 94 (79.7)                       | 37 (78.7)         | 0.02             | 56 (86.2)         | 10 (90.9)         | 0.15             |
| How often did doctors listen carefully to you?                      | 91 (77.1)                       | 35 (74.5)         | 0.06             | 50 (76.9)         | 9 (90.0)          | 0.36             |
| How often did doctors explain things in a way you could understand? | 91 (77.1)                       | 37 (78.7)         | 0.04             | 45 (70.3)         | 8 (72.7)          | 0.05             |
| Time physician spent with you                                       | 75 (60.0)                       | 25 (62.5)         | 0.05             | 35 (51.5)         | 7 (63.6)          | 0.25             |
| Physician's concern for your questions and worries                  | 86 (69.4)                       | 27 (67.5)         | 0.04             | 42 (61.8)         | 8 (72.7)          | 0.24             |
| How well physician kept you informed                                | 82 (66.7)                       | 23 (59.0)         | 0.16             | 35 (50.7)         | 7 (63.6)          | 0.26             |
| Friendliness/courtesy of physician                                  | 91 (72.8)                       | 27 (67.5)         | 0.12             | 41 (59.4)         | 9 (81.8)          | 0.51             |
| Skill of physician                                                  | 93 (75.6)                       | 28 (70.0)         | 0.13             | 51 (77.3)         | 9 (81.8)          | 0.11             |
| Total # of Questions Above with Topbox Answers (median [IQR])       | 8.0<br>[3.0, 9.0]               | 8.0<br>[3.0, 9.0] | 0.08             | 6.0<br>[3.0, 9.0] | 8.0<br>[5.5, 9.0] | 0.40             |
| Percent of Topbox Answers (median [IQR])                            | 80<br>[40, 90]                  | 80<br>[45, 90]    | 0.01             | 70<br>[32, 90]    | 89<br>[55, 90]    | 0.32             |

Topbox answer means the patient rated this question 5/5 on a Likert scale where 1 = “very poor”, 2 = “poor”, 3 = “fair”, 4 = “good”, 5 = “very good”

<sup>a</sup>Cohen offered the following guidelines for interpreting the magnitude of the SMD:

small, SMD = 0.2; medium, SMD = 0.5; and large, SMD = 0.8.<sup>17,18</sup>

Abbreviations: SMD, standardized mean difference; IQR, interquartile range

**Table e-6: Sensitivity Analysis: 30 Day Readmissions Pre vs Post Including Inpatient and Observation Status Patients**

|                                            | Intervention<br>(Neurohospitalist) |             |         |       | Control     |             |         |       | DID Analysis |        |      |         |
|--------------------------------------------|------------------------------------|-------------|---------|-------|-------------|-------------|---------|-------|--------------|--------|------|---------|
|                                            | Pre                                | Post        | p value | SMD   | Pre         | Post        | p value | SMD   | Est.         | 95% CI |      | p value |
| <u>Primary Analysis, n</u>                 | <b>1121</b>                        | <b>527</b>  |         |       | <b>717</b>  | <b>341</b>  |         |       |              |        |      |         |
| <b>30 Day Readmissions (%)</b>             | 100<br>(8.9)                       | 40<br>(7.6) | 0.42    |       | 36<br>(5.0) | 18<br>(4.7) | 0.09    |       | 0.52         | 0.27   | 0.98 | 0.044   |
| <u>Sensitivity Analysis<sup>a</sup>, n</u> | <b>940</b>                         | <b>669</b>  |         |       | <b>427</b>  | <b>295</b>  |         |       |              |        |      |         |
| <b>30 Day Readmissions (%)</b>             | 92<br>(9.8)                        | 63<br>(9.4) | 0.87    | 0.013 | 36<br>(8.4) | 22<br>(7.5) | 0.74    | 0.036 | 1.34         | 0.55   | 3.31 | 0.52    |

<sup>a</sup>Including observation and inpatient status patients with intervention group categorized by provider names

Abbreviations: DID, difference-in-difference; SMD, standardized mean difference

**Table e-7: Sensitivity Analysis: Length of Stay Pre vs Post Including Inpatient and Observation Status Patients**

| LOS                                | Adjusted Mean LOS (Estimate, 95% CI) <sup>a</sup> | Raw LOS, Mean/SD | Raw LOS, Median/IQR |
|------------------------------------|---------------------------------------------------|------------------|---------------------|
| <b>Intervention</b>                |                                                   |                  |                     |
| Pre NH                             | 4.3 (4.2 - 4.5)                                   | 4.0 (4.3)        | 3.0 [1.0, 5.0]      |
| Post NH                            | 3.5 (3.3 - 3.7)                                   | 3.0 (3.6)        | 2.0 [0.0, 4.0]      |
| <i>Post NH vs Pre NH (p value)</i> | <0.001                                            | <0.001           | <0.001              |
| <b>Control</b>                     |                                                   |                  |                     |
| Pre NH                             | 3.3 (3.07 - 3.45)                                 | 2.3 (3.1)        | 1.0 [1.0, 3.0]      |
| Post NH                            | 2.8 (2.47 - 3.12)                                 | 1.4 (3.0)        | 0.0 [0.0, 2.0]      |
| <i>Post NH vs Pre NH (p value)</i> | 0.056                                             | <0.001           | <0.001              |

<sup>a</sup>Adjusted for age, gender, primary insurance type, CMI, Charlson Comorbidity index and discharge quarter

Abbreviations: LOS, length of stay; IQR, interquartile range; NH, neurohospitalist
